# Supplementary material for: Reprogramming immunosuppressive myeloid cells by activated T cells promotes the response to anti-PD-1 therapy in colorectal cancer
Source: PubMed Central journal article supplement (PMC7791142; doi:10.1038/s41392-020-00377-3), 2021-01-08

Fig. S4

a

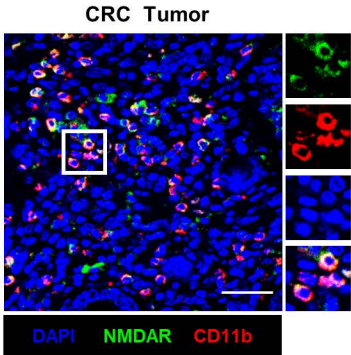

Supplement: 41392_2020_377_MOESM5_ESM.pdf [file 41392_2020_377_MOESM5_ESM.pdf]
